# Supplementary material
Source: PubMed Central journal article supplement (PMC4699893)
Supplement: mmc1.pdf [file mmc1.pdf]

## Supplementary Materials

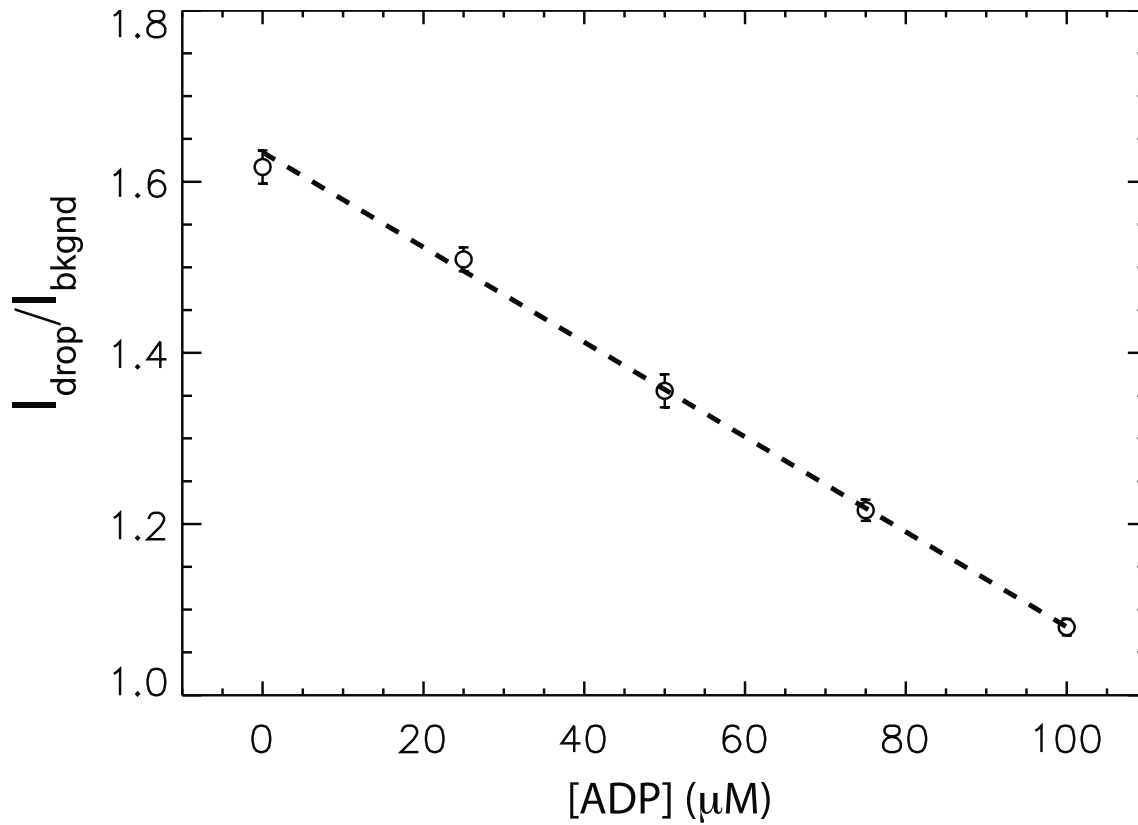

**Figure S1:** Calibration Curve of NADH fluorescence in droplet without sperm cell. Plot of mean intensity ratio of drop to background vs.  $[\text{ADP}]$ . Error bars are  $\pm$  SEM ( $n=4$ ). The dashed line is a least squares fit to the data.

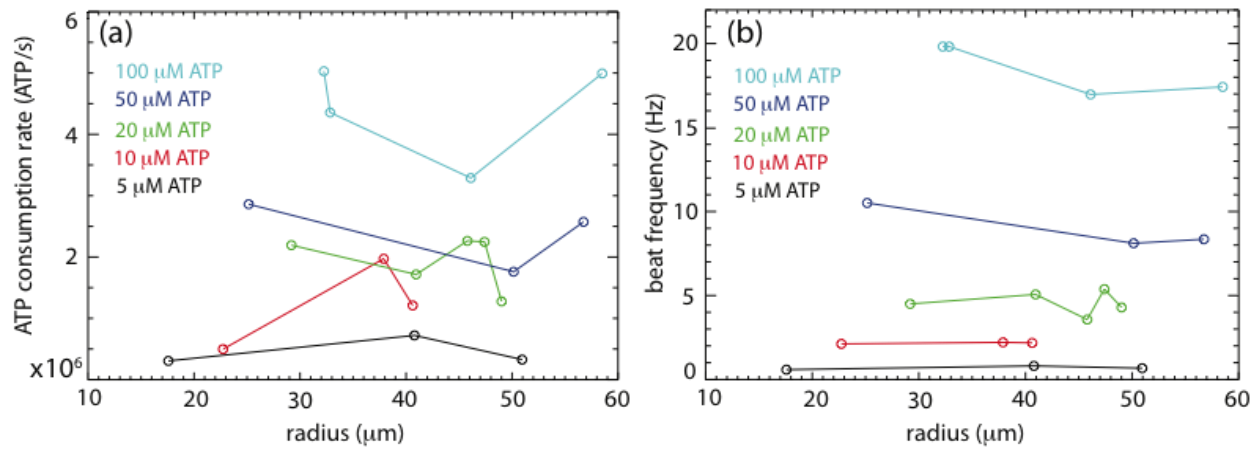

**Figure S2:** The analyses of droplet radius dependence in relation to ATP consumption rate (a) and beating frequency (b) for various [ATP] show absence of systematic trends with droplet size. Lines are eye-guides.

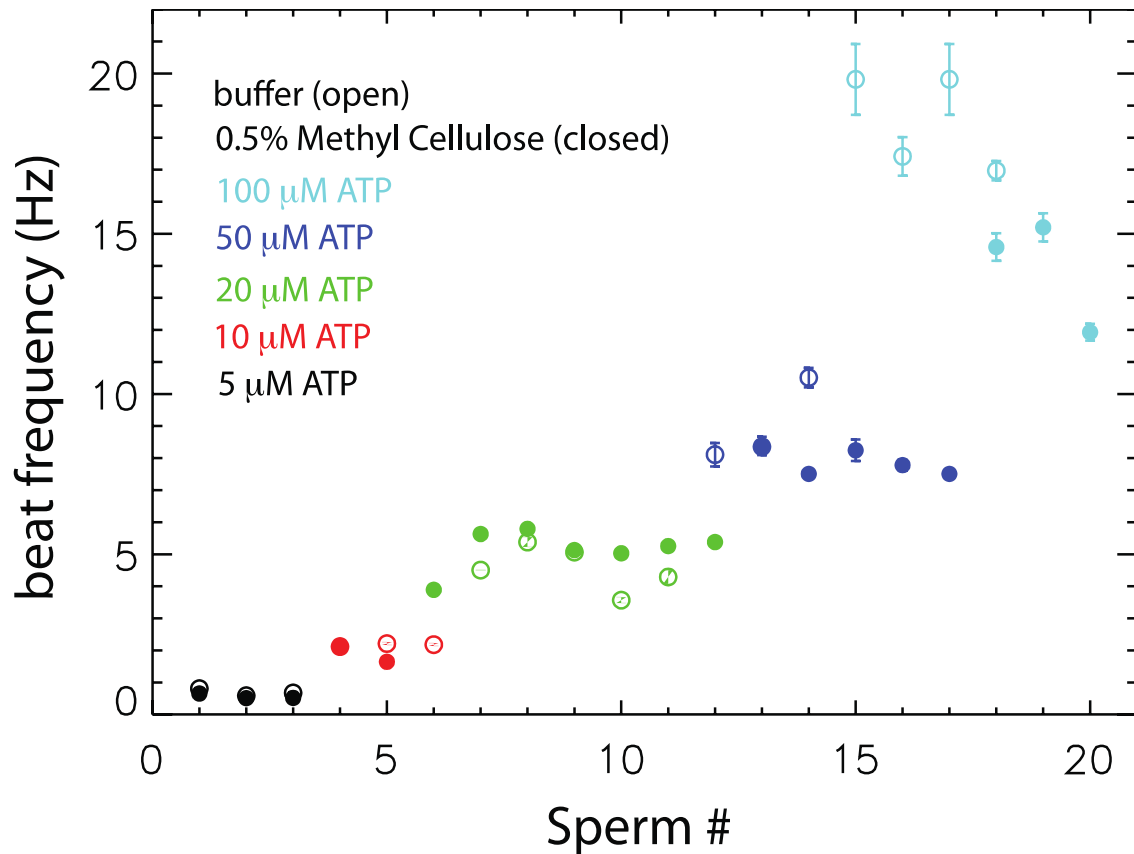

**Figure S3:** Measured beat frequency for each sperm in the dataset. Each point is the mean beat frequency  $\pm$  SEM for  $n=5$  independent measurements of the beating frequency at different times. Open circles are for sperm in standard buffer; filled circles are sperm in 0.5% w/v methyl cellulose (high viscosity). Error bars are smaller than the scatter between individual sperm at each concentration showing that inter-sperm variation is large relative to experimental resolution of the beating frequency.

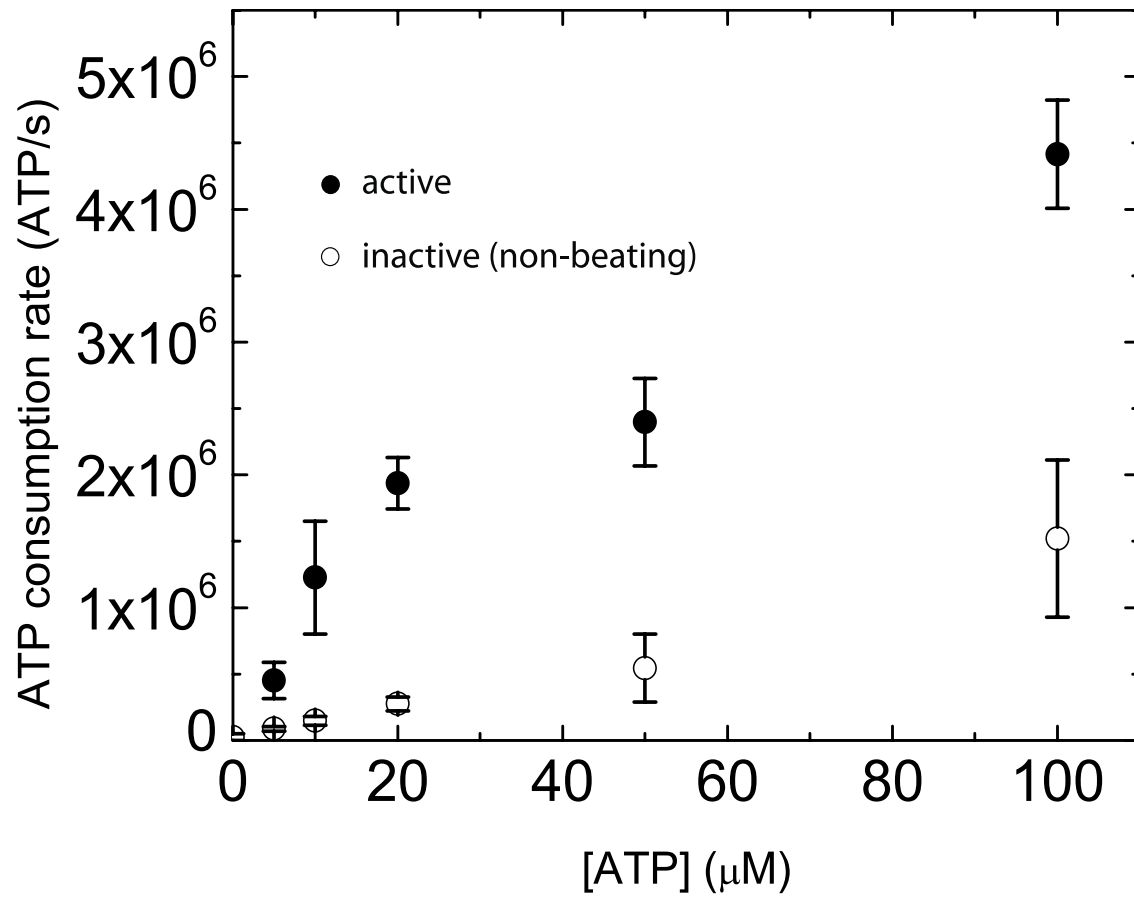

**Figure S4:** Mean ATP consumption rate vs. [ATP] for active and inactive (non-beating) sperm. Error bars are  $\pm$  SEM (n=4).

|                   | b<br>( $\mu\text{m}$ ) | L<br>( $\mu\text{m}$ ) | $\beta$<br>(mPa s) | $\alpha$<br>(N m <sup>2</sup> ) | $\lambda$<br>( $\mu\text{m}$ ) | f<br>(Hz) | U<br>( $\mu\text{m s}^{-1}$ ) | P <sub>mech</sub><br>(J s <sup>-1</sup> ) | P <sub>drag</sub><br>(J s <sup>-1</sup> ) | P <sub>ATP</sub><br>(J s <sup>-1</sup> ) | $\epsilon_{\text{chemo}}$ | $\epsilon_{\text{hydro}}$ | $\epsilon_{\text{swim}}$ |
|-------------------|------------------------|------------------------|--------------------|---------------------------------|--------------------------------|-----------|-------------------------------|-------------------------------------------|-------------------------------------------|------------------------------------------|---------------------------|---------------------------|--------------------------|
| Low<br>Viscosity  | 5                      | 45                     | 4                  | $4.5 \times 10^{-21}$           | 30                             | 5         | 46.4                          | $5.25 \times 10^{-14}$                    | $1.94 \times 10^{-16}$                    | $1.52 \times 10^{-13}$                   | 0.34                      | .004                      | .001                     |
| High<br>Viscosity | 3.5                    | 45                     | 35                 | $4.5 \times 10^{-21}$           | 21                             | 4         | 38.7                          | $9.15 \times 10^{-14}$                    | $1.18 \times 10^{-15}$                    | $1.52 \times 10^{-13}$                   | 0.6                       | .013                      | .008                     |

**Table S1:** Values of beating waveform parameters in Eq. (1) used to calculate various measures of efficiency for low and high viscosity beating waveforms for [ATP] = 20  $\mu\text{M}$  sperm in buffer (low-viscosity) and 0.5% Methyl Cellulose (high-viscosity).

**Movie S1:** Movie of sperm swimming in droplet, [ATP] = 5  $\mu\text{M}$ . Scale bar is 20  $\mu\text{m}$ .

**Movie S2:** Movie of NADH fluorescence in two neighboring droplets. The left droplet does not contain a sperm cell, whereas the right droplet contains one actively swimming sperm. [ATP] = 50  $\mu\text{M}$ . Scale bar is 20  $\mu\text{m}$ .
